# Supplementary material
Source: MDPI journal article supplement (https://www.mdpi.com/2311-7524/8/4/342)
Supplement: s1 [file s1]

## Supplementary materials

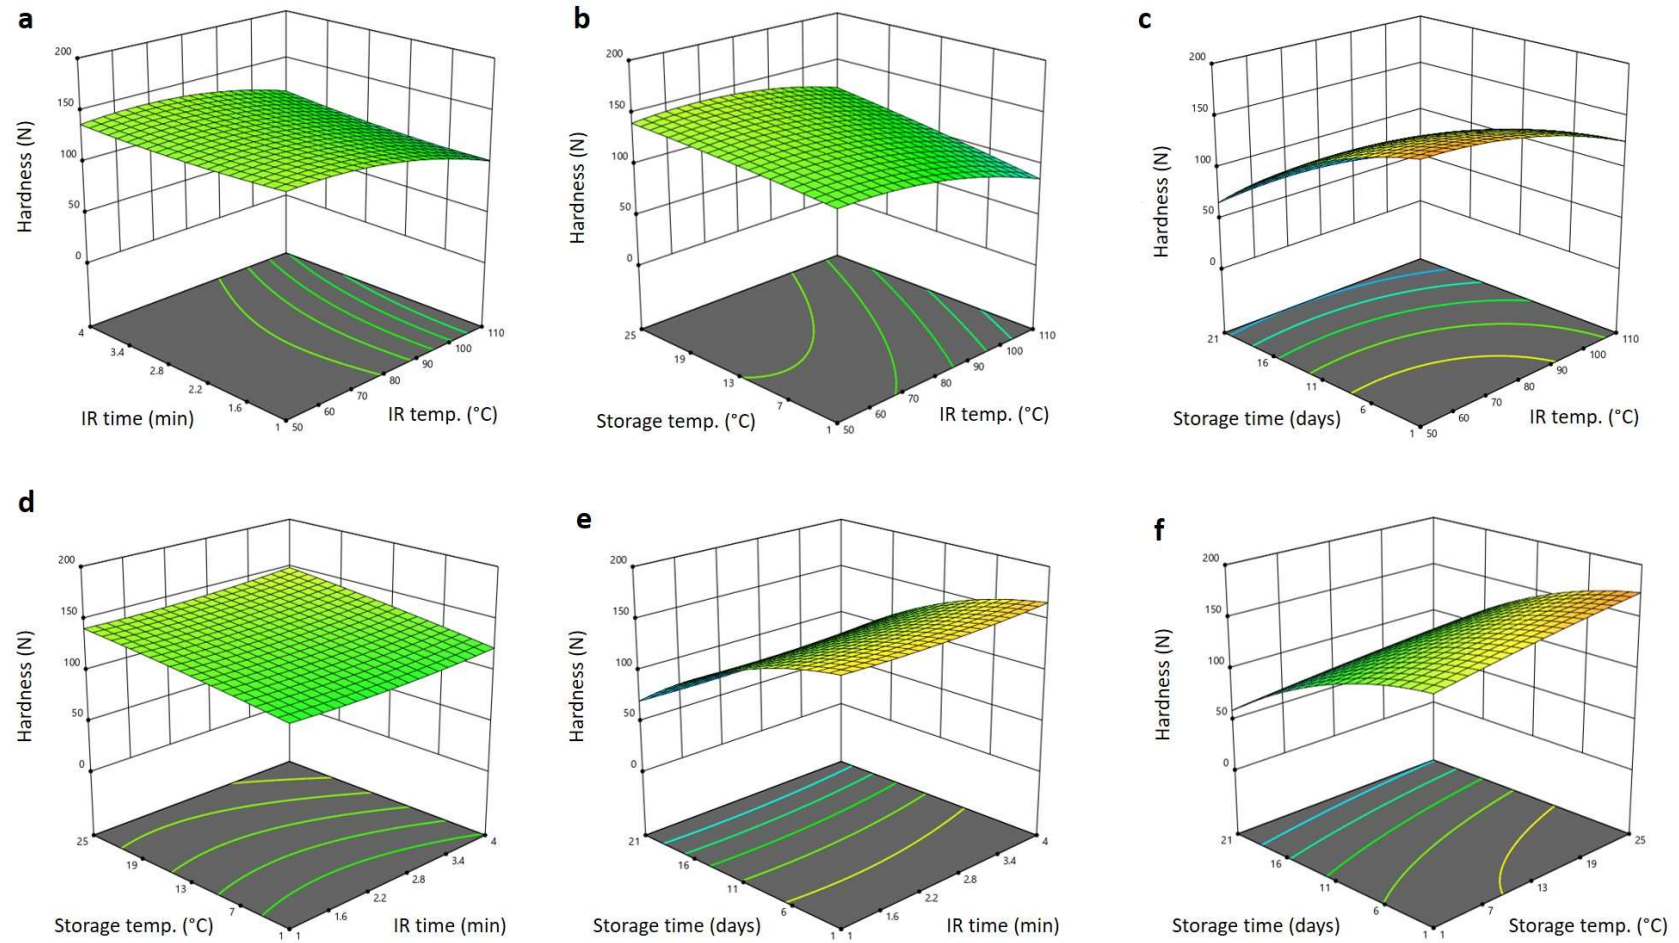

**Fig S1.** Response surface plots of hardness of Barhi dates as a function of IR time and IR temperature (a), storage temperature and IR temperature (b), storage time and IR temperature (c), storage temperature and IR time (d), storage time and IR time (e), and storage time and storage temperature (d).

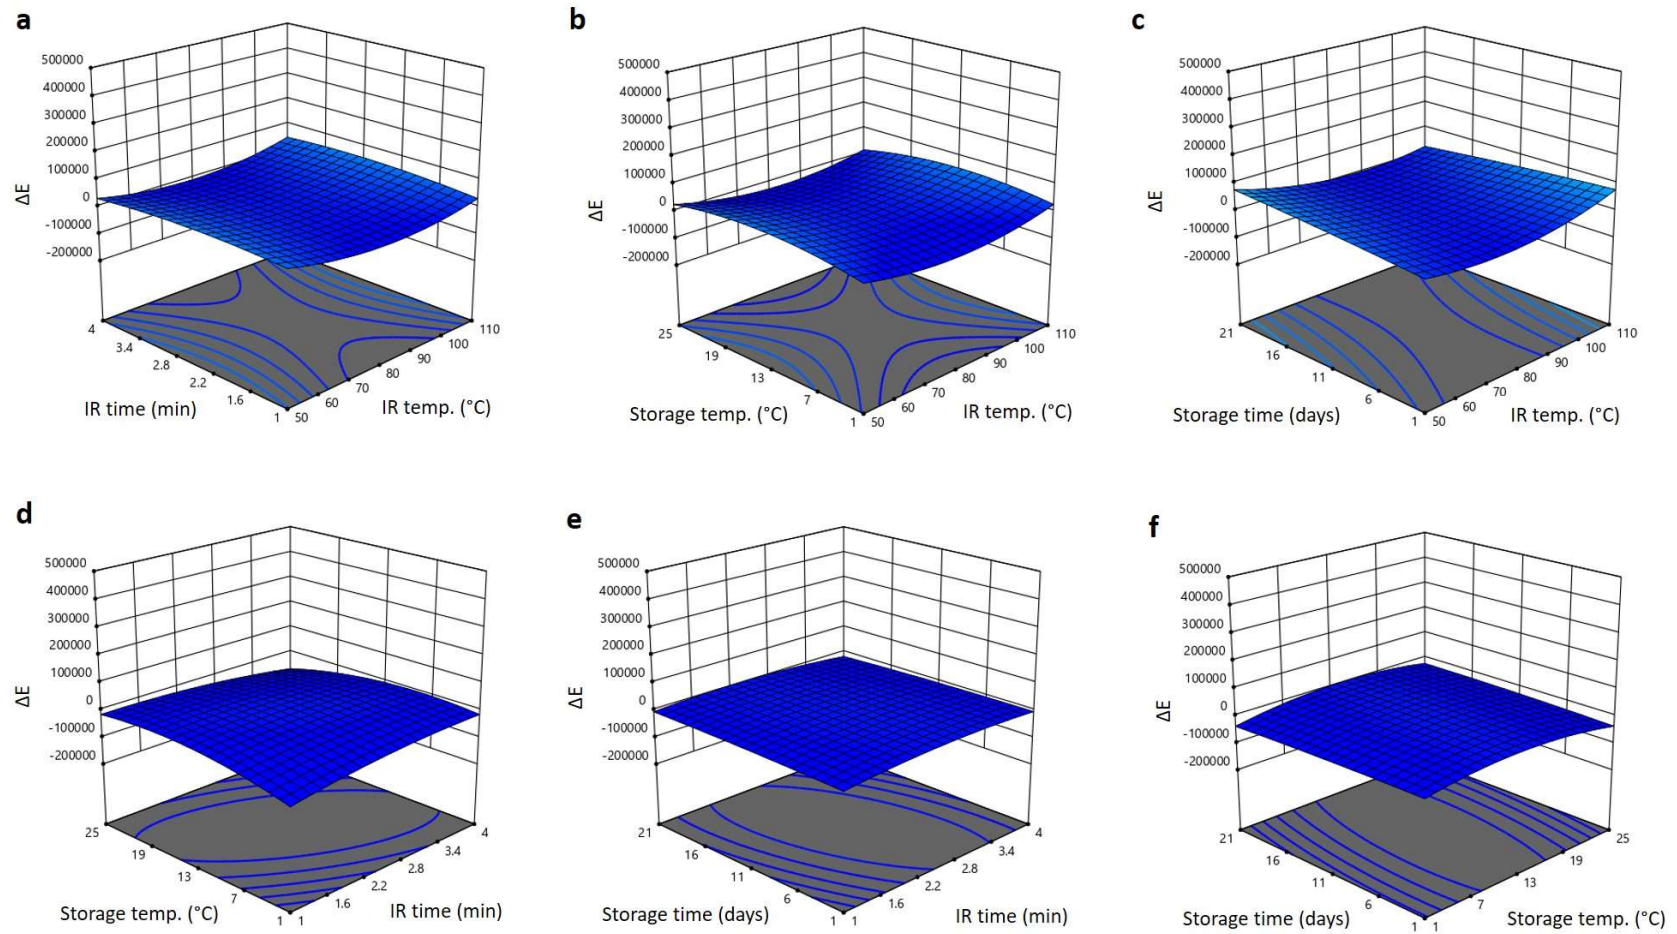

**Fig S2.** Response surface plots of total color changes ( $\Delta E$ ) of Barhi dates as a function of IR time and IR temperature (a), storage temperature and IR temperature (b), storage time and IR temperature (c), storage temperature and IR time (d), storage time and IR time (e), and storage time and storage temperature (d).
